# Supplementary material for: Structural basis for the broad-spectrum inhibition of metallo-β-lactamases by thiols
Source: Royal Society of Chemistry journal article supplement (doi:10.1039/b802311e), 2008-01-01
Supplement: b802311e.pdf [file b802311e.pdf]

**STRUCTURAL BASIS FOR THE BROAD-SPECTRUM INHIBITION  
OF METALLO- $\beta$ -LACTAMASES BY THIOLS**

**Benoit M. R. Liénard, Gianpiero Garau, Louise Horsfall, Andreas I. Karsisiotis, Christian Damblon, Patricia Lassaux, Cyril Papamichael, Gordon C. K. Roberts, Moreno Galleni, Otto Dideberg, Jean-Marie Frère and Christopher J. Schofield**

**SUPPORTING INFORMATION**

|                                |   |
|--------------------------------|---|
| I. X-ray crystallography ..... | 2 |
| II. NMR.....                   | 3 |

## I. Crystallographic data

**Table S1.** Data collection and refinement statistics

| Metallo- $\beta$ -Lactamase Inhibitor        | CphA<br><b>2</b>             | L1<br><b>5a</b>               |
|----------------------------------------------|------------------------------|-------------------------------|
| Data collection                              |                              |                               |
| Wavelength ( $\text{\AA}$ )                  | 0.93100                      | 1.54179                       |
| Resolution ( $\text{\AA}$ ) <sup>a</sup>     | 39.5 - 1.66<br>(1.70 - 1.66) | 26.55 - 2.00<br>(2.11 - 2.00) |
| Total Observations                           | 220003                       | 292187                        |
| Unique Observations                          | 30263                        | 21311                         |
| Space group                                  | C222 <sub>1</sub>            | P6 <sub>4</sub> 22            |
| Unit cell                                    |                              |                               |
| ( $\text{\AA}$ )                             | 43.0 101.0 116.8             | 105.3 105.3 98.0              |
| ( $^{\circ}$ )                               | 90.0 90.0 90.0               | 90.0 90.0 120.0               |
| Completeness (%) <sup>a</sup>                | 99.1 (99.1)                  | 96.5 (94.2)                   |
| Multiplicity <sup>a</sup>                    | 5.7 (3.2)                    | 13.7 (11.0)                   |
| R merge (%) <sup>a, b</sup>                  | 8.1 (22.2)                   | 8.4 (40.4)                    |
| $\langle I / \delta(I) \rangle$ <sup>a</sup> | 17.1(4.4)                    | 28.1 (5.5)                    |
| Refinement statistics                        |                              |                               |
| R factor / R free (%) <sup>c, d</sup>        | 14.8 / 17.0                  | 17.0 / 19.2                   |
| R. m. s. deviations                          |                              |                               |
| Bond lengths ( $\text{\AA}$ )                | 0.010                        | 0.013                         |
| Bond angles ( $^{\circ}$ )                   | 1.28                         | 1.40                          |
| Number of atoms (non-H)                      |                              |                               |
| Zn                                           | 1                            | 2                             |
| Inhibitor <sup>e</sup>                       | 1 $\times$ 14                | 1 $\times$ 11                 |
| Sulfate <sup>e</sup>                         | 4 $\times$ 5                 | 2 $\times$ 5                  |
| Glycerol <sup>e</sup>                        | 2 $\times$ 6                 | –                             |
| Water                                        | 202                          | 235                           |
| Average B-factor ( $\text{\AA}^2$ )          | 12.0                         | 30.5                          |

<sup>a</sup> Number in parentheses refer to the highest resolution shell.

<sup>b</sup>  $R_{\text{merge}} = \sum_{\text{hkl}} \sum_i |I_i - \langle I \rangle| / \sum_{\text{hkl}} \sum_i I_i$ .

<sup>c</sup>  $R_{\text{fact}} = \sum_{\text{hkl}} |F_o(\text{hkl}) - F_c(\text{hkl})| / \sum_{\text{hkl}} |F_o(\text{hkl})|$ .

<sup>d</sup>  $R_{\text{free}}$  was calculated based on 5% of the total data omitted during structure refinement

<sup>e</sup> Number of molecules  $\times$  number of atoms

### III. NMR

#### III.1 Effect of the titration of **5a/5b** to BcII followed by $^1\text{H}$ -NMR

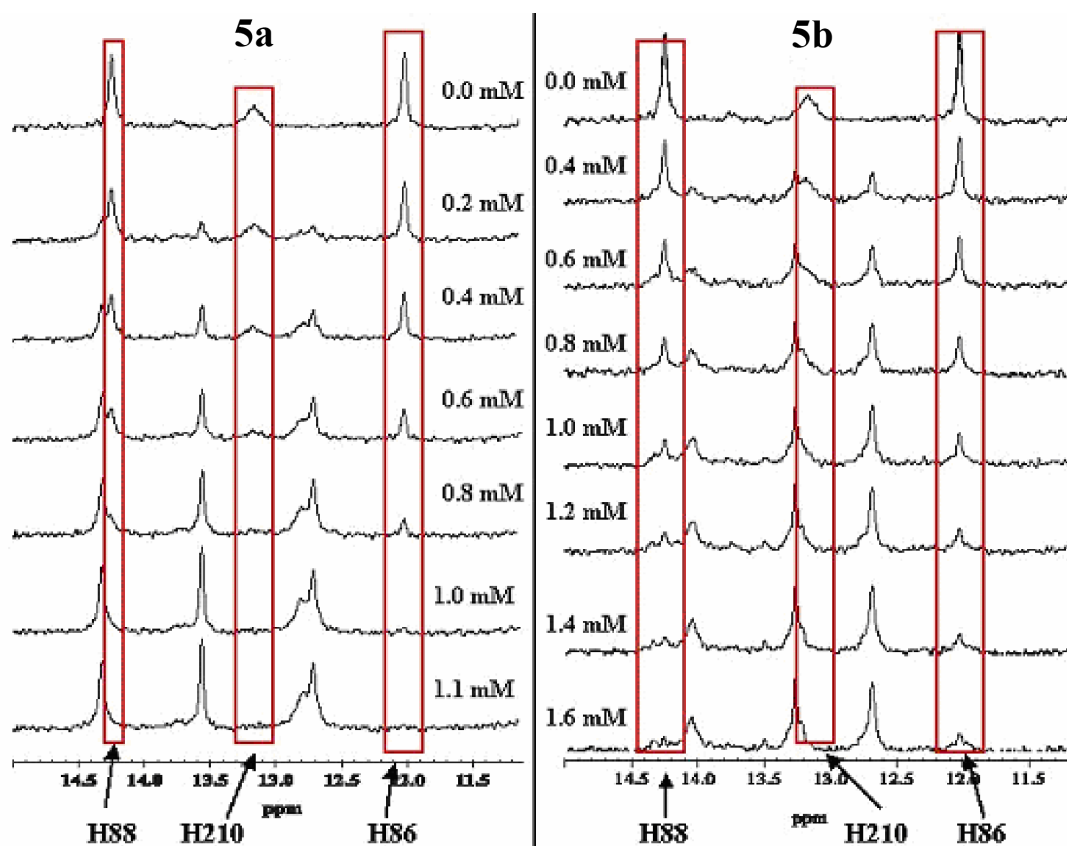

**Figure S1.** Selected region of the  $^1\text{H}$  NMR spectra of the BcII MBL from *Bacillus cereus* showing the observed changes in the imidazole NH resonance signals of the metal binding histidine residues (His86, His88 and His210) during the titration of **5a** (left panel) and **5b** (right panel).

### III.2 $^1\text{H}$ - $^{15}\text{N}$ HMQC spectra

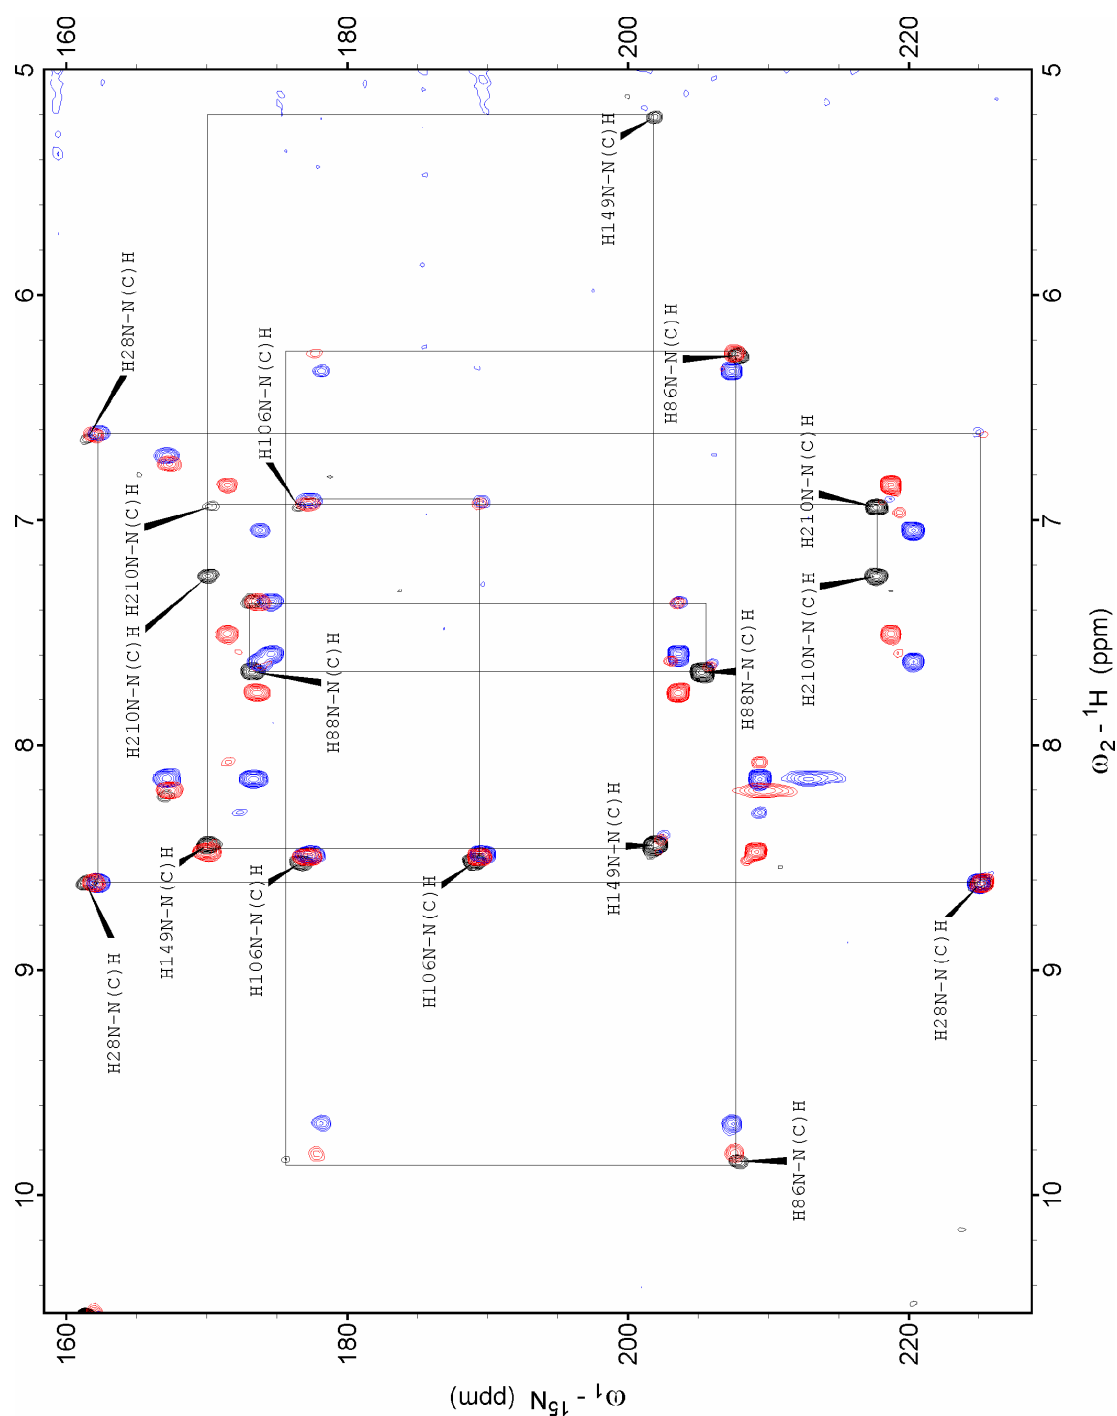

**Figure S2.**  $^1\text{H}$ - $^{15}\text{N}$  HMQC spectrum optimized for the detection of long-range  $^1\text{H}$ - $^{15}\text{N}$  couplings in the imidazole ring depicting the imidazole resonances. Cross peaks corresponding to the imidazole spin systems for BcII:Zn<sub>2</sub> are in black (connected by black lines), BcII:Zn<sub>2</sub>:5a in red and BcII:Zn<sub>2</sub>:5b in blue. Assigned spin systems are labelled by the individual cross peaks for the BcII:Zn<sub>2</sub> peaks only.
